# Supplementary material for: Gene expression profiles in Rana pirica tadpoles following exposure to a predation threat
Source: PubMed Central journal article supplement (PMC4403775; doi:10.1186/s12864-015-1389-4), 2015-04-02

Additional file 8: Figure S2.

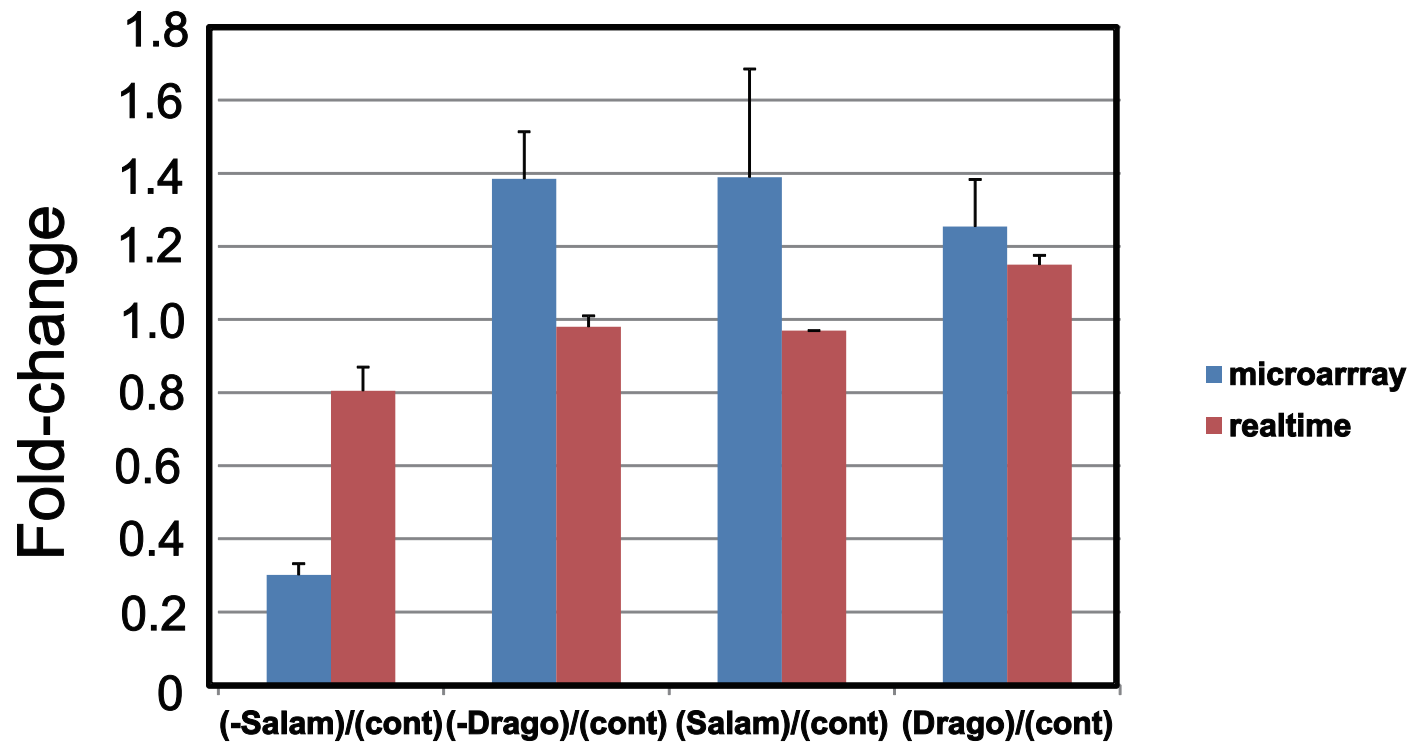

Supplement: 12864_2015_1389_MOESM8_ESM.pdf [file 12864_2015_1389_MOESM8_ESM.pdf]
